1 **Original Research**

2 **Full title: Influence of parenting styles on depression, anxiety, stress and self-esteem of**  
3 **adolescents**

4 **Short title: Parenting styles and adolescent mental health**

5 **List of authors:**

6 Rabina Khadka<sup>1¶</sup>, Anjali Bhatt<sup>1¶</sup>, Milan Thapa<sup>2</sup>, Anusha Sharma<sup>3</sup>, Manoj Joshi<sup>1</sup>, Durga Khadka  
7 Mishra<sup>4</sup>

8

9 **Author affiliations:**

10 <sup>1</sup>Department of Public Health, Manmohan Memorial Institute of Health Sciences, Tribhuvan  
11 University, Kathmandu, Nepal

12 <sup>2</sup>Department of Research and Innovation, Public Health Arena, Kathmandu, Nepal

13 <sup>3</sup>School of Public Health, Patan Academy of Health Sciences, Lalitpur, Nepal

14 <sup>4</sup>Dean, Madan Bhandari Academy of Health Sciences, Hetauda, Nepal

15

16 **\*Corresponding author**

17 Email: [bhattanjali80@gmail.com](mailto:bhattanjali80@gmail.com)

18

19 <sup>¶</sup>These authors contributed equally to this work.

## 20 **Abstract**

21 Globally, fourteen percent adolescents suffer from mental health issues. Among the many  
22 contributing factors to mental health problems, parenting is considered to have a significant effect  
23 on both the physical and psychological health of adolescents. This study aimed to assess  
24 depression, anxiety, stress, and self-esteem among adolescents and their relationship with  
25 parenting style. A community-based cross-sectional study with multistage proportionate sampling  
26 was conducted among 583 school-going adolescents from September 2022 to March 2023 in  
27 Bheemdatt Municipality. This study used the previously validated Depression Anxiety and Stress  
28 Scale-21 (DASS-21), Rosenberg Self-Esteem Scale, and Parenting Style and Dimension  
29 Questionnaire to assess the status and relationships. Variables were analyzed using a multivariate  
30 logistic regression model, and a p-value of  $<0.05$  was considered statistically significant. The  
31 prevalence of depression, anxiety, and stress among adolescents was found to be 37.39% (95% CI:  
32 33.46 to 41.32), 42.19% (95% CI: 38.18 to 46.19), and 24.69% (95% CI: 21.18 to 28.19),  
33 respectively. Likewise, the mean self-esteem score among adolescents was found to be  $22.26 \pm$   
34  $3.56$ . The authoritative parenting style was positively associated with DAS, while the authoritarian  
35 and permissive parenting styles were negatively associated with DAS and positively associated  
36 with self-esteem. Parent's age, parent's education, social support, and bullying, showed strong  
37 effects on the research outcomes. These findings highlight the crucial role of parental involvement  
38 and support in shaping adolescent mental health, underscoring the need for interventions that  
39 encourage positive parenting practices to improve mental health outcomes for adolescents. It is  
40 highly recommended that school-based programs focus on raising awareness of mental health  
41 issues and offer interventions such as stress management and student counseling. There is a  
42 pressing need to effectively monitor and enforce anti-bullying policies within educational settings.

## 43 **Introduction**

44 “Adolescence is the phase of life between childhood and adulthood, from ages 10 to 19. It is a  
45 unique stage of human development and an important time for laying the foundations of good  
46 health.”[1] Adolescents experience rapid physical, cognitive, psychological, and social changes,  
47 including exposure to poverty, abuse, or violence, which can make adolescents vulnerable to  
48 mental health problems. Most of these conditions remain largely unrecognized and untreated.[2]  
49 Globally, 1 in 7 (14%) of 10 to 19-year-olds worldwide suffer from mental health issues.[3] As  
50 per the National Mental Health Survey (NMHS), Nepal 2020, the prevalence of mental disorders  
51 among adolescents was recorded at 5.2%.[4] Moreover, within Sudurpashim province, the  
52 prevalence of mental disorders was found to be 3.9%.[4] The issue of mental health is getting  
53 worse in Nepal, and adolescents are disproportionately affected.[4–6] Adolescents exposure to risk  
54 factors like living conditions, stigma, discrimination, family situation, or lack of access to quality  
55 health services, make them vulnerable to mental health conditions.[2] Indeed, parenting style has  
56 been found to have a long-lasting effect on the development of teenagers' personalities and other  
57 psychological traits in addition to having a direct impact on their mental health.[7–9]

58 A survey by WHO in 2017 reported that among the countries of South East Asia, Nepal had the  
59 highest rates of suicidal ideation (14%) and a significant number of suicide attempts (10%) among  
60 adolescents. Additionally, 5% and 7% of adolescents, showed signs of anxiety and loneliness  
61 respectively.[6] Further survey revealed that perceived parental engagement was 54% for “parents  
62 understood their problems and worries”, 51% for “parents really knew what they were doing with  
63 their free time” and 50% for “parents checked if homework was done”.[6] Adolescents whose  
64 parents who were less engaged in their lives had attempted suicide at a rate of 15% and 6% faced

65 anxiety and loneliness respectively.[6] As a result, it is crucial to investigate how parenting style  
66 affects adolescents' mental health.

67 According to Baumrind 1971, there are three types of parenting styles: authoritative, permissive,  
68 and authoritarian.[10] Previous studies have shown that these parenting styles yield varying results  
69 on the mental health outcome of a child.[11–14] Parents play a major role in the physical and  
70 emotional development of their child. Various research has shown the influence of parenting style  
71 on the emotional development of adolescents.[11–13,15,16] Recent studies conducted in Nepal  
72 has examined how parents can enhance their adolescent's self-esteem and prevent suicidal  
73 behavior, revealing an association between parental authoritativeness and the self-esteem of their  
74 adolescents.[12] Prevalence of suicidal risk behavior among adolescents (11.3%) strongly  
75 correlates with authoritarian parents.[12]

76 Taking into account factors affecting mental health, there is limited research highlighting the  
77 impact of parenting style on adolescents' mental health, more particularly concerning depression,  
78 anxiety, stress, and self-esteem.[12] Therefore, this study aimed to assess depression, anxiety,  
79 stress, and self-esteem in adolescents and their relationship with parenting style in Bheemdatt  
80 Municipality, Kanchanpur, Nepal.

81

## 82 **Materials and methods**

### 83 **Study setting, design and population**

84 The cross-sectional study was conducted among school-going adolescents of Bheemdatt  
85 Municipality in Kanchanpur district of Sudurpaschim Province, Nepal. The study was conducted  
86 between mid-September 2022 to March 2023. The municipality was named Mahendranagar in

87 honor of the late King Mahendra of Nepal.[17] Later, it was changed to Bhimdatta municipality in  
88 honor of the revolutionary farmer leader Bhimdatta Panta, following the country's 2008 republican  
89 transition.[17] The municipality has 19 wards with the area of 171.24 km<sup>2</sup> (66.12 sq mi) and  
90 located 700 kilometers (430 miles) west of Kathmandu and 5 kilometers (3.1 mi) east of the Indian  
91 border.[17] Data collection was done in the first week of September 2022. There were 124 schools  
92 in the municipality with a population of 5648, out of which 10 schools were selected. School-going  
93 adolescents were the study population. These school-going adolescents comprised of the  
94 adolescents of grade 9 and 10.

95

## 96 **Sample size calculation and sampling technique**

97 A multistage proportionate sampling technique was used to select the schools and participants  
98 randomly. The sample size was estimated using the formula for cross-sectional survey  $n =$

99  $\frac{Z_{\alpha}^2 pq}{d^2 + \frac{Z_{\alpha}^2 pq}{N}}$  using  $p = 0.57$  and  $q = 0.43$  [18] and finite population of 5648 adolescents at confidence

100 interval of 95% and allowable error set at 5%. After the calculation, minimum sample size was  
101 353. After adjusting design effect of 1.5 and adjusting variance from cluster design and assuming  
102 nonresponse at 10%, the final sample size was 583. Two-stage cluster sampling was used where  
103 two separate lists of public and private schools of Bheemdatt Municipality were prepared and then,  
104 ten schools (5 public and 5 private schools) were chosen from the list of schools that fall under the  
105 criteria. Schools with less than 50 students were excluded from the study. Likewise, adolescents  
106 without parents were not taken in the study. Later, proportionate sampling was done to collect data  
107 from adolescents from each school.

108

## 109 **Data collection tools**

110 A self-administered questionnaire, which was used to assess the status of depression, anxiety,  
111 stress, and self-esteem in adolescents and its relationship with parenting style, was divided into  
112 three sections. The first section includes information on socio-demographic characteristics, family  
113 characteristics, and academic characteristics. The second section includes questions to measure  
114 perceived parenting style using Parenting Style and Dimension Questionnaire – Short Version  
115 (PSDQ).[19] The Third section includes questions to measure the status of depression, anxiety,  
116 and stress among adolescents using the previously validated Nepali version of Depression, Anxiety  
117 and Stress Scale - 21 (DASS-21).[20] The Fourth section includes questions to measure self-  
118 esteem levels among adolescents using the Rosenberg Self-esteem Scale.[21]

119 Parenting Style and Dimension Questionnaire – Short Version (PSDQ) was used to assess the  
120 adolescents' perception of parenting style. The Short Version of the PSDQ consists of 32 items  
121 rated on a five-point Likert-type scale ranging from 1 (never) to 5 (always).[19] The Depression,  
122 Anxiety, and Stress Scale - 21 Items (DASS-21) is a set of three self-report scales designed to  
123 measure the emotional states of depression, anxiety, and stress. Each of the three DASS-21 scales  
124 contains 7 items, divided into subscales with similar content. Each item is rated on a 4-point Likert  
125 scale, ranging from 0 (indicating "did not apply to me at all") to 3 (indicating "applied to me very  
126 much"). Scores for DAS were calculated by summing the scores for the relevant items and  
127 multiplying by two.[20] Rosenberg Self-esteem Scale, which was used to measure self-esteem in  
128 the study, is a 10-item scale that measures global self-worth by measuring both positive and  
129 negative feelings about the self. The scale is believed to be uni-dimensional. All items are  
130 answered using a 4-point Likert scale format ranging from strongly agree to strongly disagree.[21]

131

## 132 **Data collection procedure and technique**

133 The data collection for the study was started on the mid September 2022 after the authorization of  
134 the ethical approval on the first week of September 2022. Data was collected after the permission  
135 from the municipal education division and individual secondary schools. The questionnaire was  
136 pretested among 58 school-going adolescents of Kathmandu Metropolitan. Self-administered  
137 questionnaires were distributed among the students, and orientation session was provided to  
138 students before data collection, and information on mental health issues was provided to students  
139 at the end of the session. Written informed consent was taken from all students prior to data  
140 collection whereas additional written parental consent was obtained from students below 18 years  
141 of age.

142

## 143 **Data analysis**

144 The data entry form was created prior to data collection in IBM SPSS Statistics version 16 and  
145 was later entered, cleaned, and sorted for further analysis. Descriptive analysis was performed and  
146 frequency tables with percentage was generated for categorical variables and mean and standard  
147 deviation for continuous variables.

148 Binary logistic regression was performed to identify associated factors of symptoms of DAS.  
149 Firstly, we performed a univariate analysis in which each co-variate was modeled separately to  
150 determine the odds of DAS. Candidate variables for multivariable logistic regression were those  
151 whose univariate analysis yielded a p-value less than 0.05. A p-value of less than 0.05 was deemed  
152 statistically significant in multivariable logistic regression, and the strength of association was  
153 measured using the adjusted odds ratio (AOR) with a 95% confidence interval.

154

## 155 **Ethical approval and consent**

156 All the activities associated with the study proceeded after acquiring the required authorization  
157 from the Manmohan Memorial Institute of Health Sciences' Institutional Review Committee  
158 (MMIHS IRC 875; Ref 79/139; Date: 1 September 2022). Prior approval was sought from the  
159 municipality's education sector and the school administration before data collection. Participants  
160 were also well-informed about the study. A written informed consent was obtained from the  
161 students before the data collection to ensure their willingness to participate and no identification  
162 was included in the questionnaire to ensure anonymity and confidentiality. Parental consent was  
163 obtained for students who were under the age of 18.

164

## 165 **Results**

### 166 **Sociodemographic, family, and contextual characteristics of**

### 167 **adolescents**

168 The research questionnaires were distributed among 583 school-going adolescents from 5 public  
169 and private schools each.

170 Table 1 demonstrates the demographic and family characteristics of the respondents. The mean  
171 age of the respondents was  $15.41 \pm 1.02$  ranging from 10-18 years. Among 583 participants, more  
172 than half of the respondents (58.8%) were male in comparison to female respondents (40.8%).

173 With regards to academic characteristics, about two-thirds of the respondents (64.5%) belonged to  
174 public schools and more than half (57.5%) were in grade 10. Five-sixth of the respondents (83%)  
175 were from Brahmin/Chettri ethnicity. Talking about the parent's educational status, just over five-  
176 sixth of mothers (84.6%) were literate and the majority of the fathers (96.2%) were literate.



177 Likewise, the majority of the students responded that their father as well as mother had attained a  
 178 secondary level of education. Likewise, 15000-30000 was the majority of the income in most  
 179 families, that is 28%. The majority of the parents (93%) were married while the remaining tiny  
 180 fraction (0.9%) were separated and divorced respectively. More than half (55.2 %) of the  
 181 respondents lived in the nuclear family.

182 It was noted that the majority of the adolescents (86.3%) were single and the majority of  
 183 adolescents (80.8%) described their relationship with friends as close and two third (66.6%) of  
 184 adolescents described their relationship with teachers as close. Talking about the involvement in  
 185 extracurricular activities, it was found that the majority (80.3%) were involved in extracurricular  
 186 activities (ECA) with just over two-thirds (67.5%) involvement in sports activity. Likewise, just  
 187 over a quarter (28%) of the adolescents complained of being bullied, of which nearly half of the  
 188 adolescents (46.4%) were bullied in the school environment.

189

190 **Table 1. Socio-demographic characteristics of respondents**

| Socio-demographic Characteristics | Category          | Frequency | Percentage   |
|-----------------------------------|-------------------|-----------|--------------|
| Sex                               | Male              | 344       | 59.0         |
|                                   | Female            | 239       | 41.0         |
| Age in years                      | Mean ± SD         |           | 15.41 ± 1.02 |
|                                   | ≤ 15              | 297       | 50.9         |
|                                   | > 15              | 286       | 49.1         |
| Type of School                    | Public            | 376       | 64.5         |
|                                   | Private           | 207       | 35.5         |
| Ethnicity                         | Brahmin/Chettri   | 470       | 82.5         |
|                                   | Janajati          | 40        | 6.9          |
|                                   | Dalit             | 44        | 7.5          |
|                                   | Thakuri           | 22        | 3.8          |
|                                   | Prefer not to say | 7         | 1.2          |
| Grade                             | Nine              | 248       | 42.5         |
|                                   | Ten               | 335       | 57.5         |
| Mother's Education                | Literate          | 493       | 84.6         |

|                            |                      |     |              |
|----------------------------|----------------------|-----|--------------|
| Father's Education         | Illiterate           | 90  | 15.4         |
|                            | Literate             | 561 | 96.2         |
| Family Income              | Illiterate           | 22  | 3.8          |
|                            | <15000               | 150 | 25.7         |
|                            | 15000-30000          | 163 | 28           |
|                            | 30000-45000          | 146 | 25           |
| Mother's Age               | > 45000              | 124 | 21.3         |
|                            | Mean ± SD            |     | 38.42 ± 5.23 |
|                            | ≤ 45                 | 538 | 92.3         |
| Father's Age               | > 45                 | 45  | 7.7          |
|                            | Mean ± SD            |     | 42.75 ± 5.76 |
|                            | ≤ 40                 | 251 | 43.1         |
| Parent's Marital Status    | > 40                 | 332 | 56.9         |
|                            | Married              | 573 | 98.3         |
|                            | Separated            | 5   | 0.9          |
| Type of Family             | Divorced             | 5   | 0.9          |
|                            | Nuclear              | 322 | 55.2         |
|                            | Joint/Extended       | 261 | 44.8         |
| Relationship Status        | Single               | 503 | 86.3         |
|                            | Dating               | 80  | 13.7         |
| Relationship with Friends  | Close                | 471 | 80.8         |
|                            | Not close            | 112 | 19.2         |
| Relationship with Teachers | Close                | 388 | 66.6         |
|                            | Not close            | 195 | 33.4         |
| Involvement in ECA         | Yes                  | 468 | 80.3         |
|                            | No                   | 115 | 19.7         |
| If yes,                    | Sports               | 315 | 67.5         |
|                            | Community Engagement | 11  | 2.4          |
|                            | Social Works         | 53  | 11.3         |
|                            | Others               | 88  | 18.8         |
| Bullying                   | Yes                  | 165 | 28.3         |
|                            | No                   | 418 | 71.7         |
| If yes,                    | School               | 77  | 46.4         |
|                            | Online               | 32  | 19.3         |
|                            | Society              | 32  | 19.3         |
|                            | Others               | 25  | 15.1         |

191

192

193

## 194 Perceived parenting style among adolescents

195 The results of perceived parenting style and its dimensions are shown in Table 2. It was found that  
196 the percentage of authoritative parenting style was 83.2%, authoritarian parenting style was 43.6%  
197 and permissive parenting style was 56.6%. The overall mean scores of authoritative, authoritarian,  
198 and permissive parenting styles were  $4.16 \pm 0.64$ ,  $2.18 \pm 0.83$ , and  $2.83 \pm 0.84$ , respectively.

199 **Table 2. Perceived parenting style among adolescents (n = 583)**

| Parenting Style | Dimensions             | Mean $\pm$ SD   |
|-----------------|------------------------|-----------------|
| Authoritative   | Connection             | $4.36 \pm 0.67$ |
|                 | Regulation             | $4.35 \pm 0.70$ |
|                 | Autonomy               | $3.77 \pm 0.95$ |
| Authoritarian   | Physical Coercion      | $2.32 \pm 1.13$ |
|                 | Verbal Hostility       | $2.45 \pm 1.05$ |
|                 | Non-Reasoning/Punitive | $1.77 \pm 0.89$ |
| Permissive      | Indulgent              | $2.83 \pm 0.84$ |

200

201

202

203

204

205

206

207

## 208 Prevalence of depression, anxiety, and stress among adolescents

209 The prevalence of symptoms of depression, anxiety, and stress was found to be 37.39% (95% CI:  
210 33.46%, 41.32%) 42.19% (95% CI: 38.18%, 46.19%), and 24.69% (95% CI: 21.18%, 28.19%)  
211 respectively. (Table 3)

212 **Table 3. Prevalence of depression, anxiety, and stress among adolescents (n = 583)**

| Level               | Depression |      | Anxiety |      | Stress |      |
|---------------------|------------|------|---------|------|--------|------|
|                     | n          | %    | n       | %    | n      | %    |
| No                  | 365        | 62.6 | 337     | 57.8 | 439    | 75.3 |
| Mild                | 83         | 14.2 | 49      | 8.4  | 49     | 8.4  |
| Moderate            | 93         | 16.0 | 101     | 17.3 | 50     | 8.6  |
| severe              | 19         | 3.3  | 41      | 7.0  | 34     | 5.8  |
| Extremely<br>severe | 23         | 3.9  | 55      | 9.4  | 11     | 1.9  |

213

## 214 Self-esteem among adolescents

215 The mean self-esteem score was  $22.26 \pm 3.56$ . About the majority of the adolescents (69.3%)  
216 showed high self-esteem while the remaining (30.7%) of the adolescents had low self-esteem.

217

## 218 Association between parenting style and outcome variables

219 Table 4 represents the significant relationship between parenting style variables and depression,  
220 stress, anxiety, and self-esteem. It was found that authoritative parenting style has a low negative  
221 correlation with depression ( $r = -0.21$ ) and anxiety variable ( $r = -0.20$ ) and negligible negative  
222 correlation with stress ( $r = -0.19$ ) and self-esteem variable ( $r = -0.16$ ). Likewise, authoritarian  
223 parenting style showed a negligible positive correlation with DAS variables ( $r_d = 0.15$ ,  $r_a = 0.13$ ,  
224  $r_s = 0.08$ ), while, low positive relation with self-esteem ( $r = 0.15$ ). Similarly, the data revealed that

225 permissive parenting style has a negligible positive correlation with DAS variables ( $r_d = 0.10$ ,  $r_a =$   
 226  $0.06$ ,  $r_s = 0.11$ ) and self-esteem ( $r = 0.07$ ).

227 **Table 4. Association between parenting style and outcome variables**

| Variables            | Depression |                   | Anxiety |                   | Stress |               | Self-esteem |               |
|----------------------|------------|-------------------|---------|-------------------|--------|---------------|-------------|---------------|
|                      | r          | p-value           | r       | p-value           | r      | p-value       | r           | p-value       |
| <b>Authoritative</b> | -0.21      | <b>&lt;0.0001</b> | -0.20   | <b>&lt;0.0001</b> | -0.19  | <b>0.0001</b> | -0.16       | <b>0.0001</b> |
| <b>Authoritarian</b> | 0.15       | <b>0.0003</b>     | 0.13    | <b>0.0019</b>     | 0.08   | 0.0637        | 0.15        | <b>0.0004</b> |
| <b>Permissive</b>    | 0.10       | <b>0.0132</b>     | 0.06    | 0.1376            | 0.11   | <b>0.0060</b> | 0.07        | 0.1042        |

228

## 229 **Factors associated with depression**

230 The results of multivariate logistic regression for the factors associated with depression are shown  
 231 in Table 5. In the final model, the father’s age and bullying were found to be significantly  
 232 associated with depression. Results showed that the odds of depression among adolescents having  
 233 fathers aged >50 was 2.05 times (AOR=2.05, 95% CI 1.07 – 3.93) more likely than adolescents  
 234 with fathers aged ≤ 50. Likewise, the odds of depression among adolescents who reported bullying  
 235 was 2.42 times (AOR=2.42, 95% CI 1.64 – 3.55) more likely than in adolescents who didn’t report  
 236 bullying.

237

238

239

## 240 **Factors associated with anxiety**

241 The results of multivariate logistic regression for the factors associated with anxiety are shown in  
242 Table 5. The variables that remained in the final model were grade, relationship with friends, and  
243 bullying. Grade (AOR=1.81, 95% CI 1.27 – 2.58), Relationship with friends (AOR=1.99, 95% CI  
244 1.28 – 3.10), Relationship with teachers (COR=1.49, 95% CI 1.05 – 2.11) and bullying  
245 (AOR=2.26, 95% CI 1.67 – 3.62) was found to be significantly associated with symptoms of  
246 anxiety.

247

## 248 **Factors associated with stress**

249 Factors associated with stress are presented in Table 5. Multivariate logistic regression between  
250 stress and selected independent variables showed that sex (AOR=0.46, 95% CI 0.31 – 0.69), grade  
251 (AOR=1.73, 95% CI 1.15 – 2.60), relationship with friends (AOR=1.71, 95% CI 1.07 – 2.73),  
252 relationship with teachers (AOR=1.95, 95% CI 1.29 – 2.96) and bullying (AOR=1.95, 95% CI  
253 1.27 – 3.01) were significantly associated with symptoms of stress.

254

## 255 **Factors associated with self-esteem**

256 The final model of multivariate logistic regression between self-esteem and selected independent  
257 variables showed that age (AOR=1.88, 95% CI 1.18 – 3.00), relationship with friends (AOR=2.68,  
258 95% CI 1.51 – 4.76), involvement in ECA (AOR=1.67, 95% CI 1.01 – 2.76) and bullying  
259 (AOR=2.37, 95% CI 1.47 – 3.82) were significantly associated, as displayed in Table 5.

260

261 **Table 5. Factors affecting depression, anxiety, stress and self-esteem among adolescents**

| <b>Characteristics</b>     | <b>Depression<sup>1</sup></b><br>AOR, 95% CI | <b>Anxiety<sup>2</sup></b><br>AOR, 95% CI | <b>Stress<sup>3</sup></b><br>AOR, 95% CI | <b>Self-esteem<sup>4</sup></b><br>AOR, 95% CI |
|----------------------------|----------------------------------------------|-------------------------------------------|------------------------------------------|-----------------------------------------------|
| <b>Sex</b>                 |                                              |                                           |                                          |                                               |
| Male                       |                                              |                                           | Ref                                      | 1.36 (0.94 – 1.98)                            |
| Female                     |                                              |                                           | 2.17 (1.44- 3.27) *                      | Ref                                           |
| <b>Age</b>                 |                                              |                                           |                                          |                                               |
| ≤ 15                       |                                              |                                           |                                          | Ref                                           |
| > 15                       |                                              |                                           |                                          | 1.88 (1.18 – 3.00) *                          |
| <b>Grade</b>               |                                              |                                           |                                          |                                               |
| 9                          |                                              | Ref                                       | Ref                                      |                                               |
| 10                         |                                              | 1.81 (1.27 – 2.58) *                      | 1.73 (1.15 – 2.60) *                     |                                               |
| <b>Mother's education</b>  |                                              |                                           |                                          |                                               |
| Illiterate                 | 1.50 (0.93 – 2.42)                           |                                           |                                          |                                               |
| Literate                   | Ref                                          |                                           |                                          |                                               |
| <b>Father's education</b>  |                                              |                                           |                                          |                                               |
| Illiterate                 |                                              |                                           |                                          | 3.79 (0.85 – 16.86)                           |
| Literate                   |                                              |                                           |                                          | Ref                                           |
| <b>Father's age</b>        |                                              |                                           |                                          |                                               |
| ≤ 45                       | Ref                                          |                                           |                                          |                                               |
| > 45                       | 2.05 (1.07 – 3.93) *                         |                                           |                                          |                                               |
| <b>Relationship status</b> |                                              |                                           |                                          |                                               |

|                                  |                      |                      |                      |                      |
|----------------------------------|----------------------|----------------------|----------------------|----------------------|
| Single                           |                      |                      |                      | Ref                  |
| Dating                           |                      |                      |                      | 1.63 (0.90 – 2.95)   |
| <b>Relationship with friends</b> |                      |                      |                      |                      |
| Not close                        | 1.17 (0.76 – 1.84)   | 1.99 (1.28 – 3.10) * | 1.71 (1.07 – 2.73) * | 2.68 (1.51 – 4.76) * |
| Close                            | Ref                  | Ref                  | Ref                  | Ref                  |
| <b>Relationship with teacher</b> |                      |                      |                      |                      |
| Not close                        | 1.33 (0.91 – 1.94)   | 1.15 (0.79 – 1.68)   | 1.95 (1.29 – 2.96) * | 1.08 (0.70 – 1.65)   |
| Close                            | Ref                  | Ref                  | Ref                  | Ref                  |
| <b>Involvement in ECA</b>        |                      |                      |                      |                      |
| No                               |                      |                      |                      | 1.67 (1.01 – 2.76) * |
| Yes                              |                      |                      |                      | Ref                  |
| <b>Bullying</b>                  |                      |                      |                      |                      |
| No                               | Ref                  | Ref                  | Ref                  | Ref                  |
| Yes                              | 2.42 (1.64 – 3.55) * | 2.26 (1.67 – 3.62) * | 1.95 (1.27 – 3.01) * | 2.37 (1.47 – 3.82) * |

<sup>1</sup>adjusted for education of mother, age of father, relationship with friends, relationship with teacher and bullying

<sup>2</sup>adjusted for grade of study, relationship with friends, relationship with teacher and bullying

<sup>3</sup>adjusted for sex of the respondent, grade of study, relationship status, relationship with teacher and bullying

<sup>4</sup>adjusted for age, grade of study, education of father, relationship with friends, relationship with teacher, involvement in ECA and bullying

OR: Odds Ratio

CI: Confidence Interval

Ref: Reference group

\*Statistically significant at  $p < 0.05$



## 263 **Discussion**

264 The present study elucidates the intricate associations between parenting styles and various  
265 psychological outcomes, including depression, anxiety, stress, and self-esteem among adolescents.  
266 Our findings underscore the nuanced influence of parenting approaches, with the authoritative  
267 parenting style exhibiting a low negative correlation with DAS and self-esteem while the  
268 authoritarian and permissive parenting style showed a negligible positive correlation across these  
269 psychological dimensions.

270 These results are consistent with the data obtained in research by Sanjeevan, et. al which indicated  
271 that authoritative parenting style correlated with a lower level of DAS while neglectful parenting  
272 style with a higher level of DAS.[14] A cross-sectional study on US adolescents revealed parental  
273 care and control were associated with mental health disorders among adolescents with involved  
274 parenting having a positive role and neglectful parenting having the negative role.[22] Likewise,  
275 Mishra et. al demonstrated a significant relationship between anxiety and parents adopting an  
276 authoritative parenting style and has shown an increase in social anxiety in adolescents with  
277 authoritative parents.[23] The current study found that authoritative parenting style was  
278 significantly associated with depression. This outcome is corroborated by that of Prativa et. al  
279 which indicated a negative correlation between authoritative parenting style and depression in  
280 adolescents that is more authoritative parenting style is associated with less depression in  
281 adolescents.[15] Similar results were found in the study conducted in Japan in later adults [24] and  
282 in Indonesia in high school students.[25]

283 Research findings showed a negative association of self-esteem with authoritative parenting style  
284 and a positive association with authoritarian and permissive parenting styles. This differs from the

285 existing study conducted on the urban high school students of Nepal by Banstola et al. which  
286 reported a positive association between parental authoritativeness and self-esteem.[12] This  
287 discrepancy might be due to differences in the study setting and population. Likewise, a study in  
288 Indonesia showed a beneficial effect of authoritative parents on self-esteem and a negative effect  
289 of authoritarian parents on self-esteem, which differs from the research findings.[25] Research  
290 study by Milevsky et. al revealed the supportive role of an authoritative parenting style in  
291 increasing self-esteem.[11] The possible explanation for these results may be due to the nature of  
292 parenting style. It has been evident that an authoritative parenting style is characterized by parents  
293 who tend to display love and warmth, and high responsiveness towards the children. This reason  
294 might have resulted in a decrease in the symptoms of DAS among school-going adolescents.[22]  
295 However, the authoritative parenting style showed a negative correlation with self-esteem which  
296 resulted in a decrease in self-esteem. The result might be explained by the fact that the control  
297 nature of authoritative parents might increase the high expectations towards children as a result  
298 this will decrease self-esteem in adolescents. Likewise, authoritarian and permissive parenting  
299 styles showed negative association with DAS and self-esteem. This relationship may partly be  
300 explained by the fact that authoritarian parents try to keep their children in the controlled  
301 environment pressurizing their children which will increase DAS.[22,26] Likewise, permissive  
302 parents are less involved with their children which might have increased DAS.[26,27]

303 Study results revealed the prevalence of depression, anxiety, and stress to be 37.39%, 42.19%, and  
304 24.69% respectively. Existing research conducted by Gautam et. al in the rural setting of Nepal  
305 showed about one-quarter of the high school students that is 27% showed depressive  
306 symptoms[28] which is lower than the study. Likewise, Sharma et. al research conducted among  
307 public schools of Kathmandu Valley reported the higher prevalence of depressive symptoms which

308 is 41.6%.[29] Similarly, more than half that is 56.9% of students showed symptoms of anxiety and  
309 more than 1/4<sup>th</sup> of students that is 27.5% showed symptoms of stress corroborating research  
310 findings.[29] Another study conducted by Bhandari et. al revealed that roughly one out of every  
311 two students (46.5%) experienced symptoms of anxiety.[30] Likewise, the study by Karki et. al  
312 revealed more than half (56.5%) of the high school students of Kathmandu showed symptoms of  
313 depression and a similar proportion (55.6%) showed anxiety symptoms, and about 1/4<sup>th</sup> of the  
314 students showed stress symptoms that is 32.9%.[18] These findings are inconsistent with current  
315 research. The prevalence of depression was found high as compared to study conducted in the rural  
316 setting of Nepal. One of the possible explanations for this could be that data was collected at the  
317 very exam season. During this period students may have struggled academically and displayed  
318 symptoms of depression, anxiety and stress. Likewise, majority of the students in the study were  
319 grade 10 students, who were under constant pressure for approaching SEE exams. Taking into  
320 account academic characteristics of the adolescents, grades showed significant association with  
321 stress. This was in line with a study conducted in India[31] and Bangladesh.[32] Among South  
322 Asian countries, the prevalence of depression reported by our study is lower than the studies  
323 conducted in India, Bangladesh, and China.[33–36] On the contrary, the prevalence of anxiety as  
324 reported by the current study is in line with the studies conducted in China and Vietnam, but higher  
325 than that of Sri Lanka and lower than that of India.[33,35,37,38] Likewise, the prevalence of stress  
326 is comparable with the study conducted in Manipur, India but lower than that of a similar study  
327 conducted in Chandigarh, India.[34,39] These findings suggested the increasing burden of DAS  
328 among school-going adolescents in South Asia. The mean self-esteem score in this study was  
329 found to be  $22.26 \pm 3.56$ . The study has shown that the majority of the adolescents (69.3%) showed  
330 high self-esteem scores. This was in line with the study conducted in Nigeria ( $24.0 \pm 3.3$ ).[40]

331 However, this differs from the research findings of Banstola et. al ( $16.59 \pm 0.16$ )[12] and study in  
332 Iran ( $38.49 \pm 6.55$ ).[41] The possible reason for this might be the difference in study setting and  
333 population.

334 In the current study, it was found that female adolescents were more likely to suffer from  
335 symptoms of stress than male adolescents. The findings of the study are consistent with the  
336 research of Sharma et. al which showed higher symptoms of stress in females.[18] This is  
337 inconsistent with the findings of the previous research studies.[37,42–45] The possible explanation  
338 must be the difference in parenting between male and female adolescents which can result in  
339 differences in the mental status of the adolescents. Likewise, females are more likely to be exposed  
340 to the family burden and social stigma. Similarly, the current study showed higher self-esteem  
341 scores in male adolescents than in female adolescents. These results agree with the findings of a  
342 study by Banstola et. al.[12] Likewise, study in Iran showed higher self-esteem in male adolescents  
343 than female adolescents.[41] On the contrary, another study in Iran reported higher mean scores  
344 of girls than boys.[16]

345 This study found the risk of depression was higher in adolescents with mothers without any formal  
346 education. The possible explanation might be illiterate mothers don't have a stronger knowledge  
347 of the child's mental health status and how to react to the child's aspirations and demands which  
348 in turn can result in early signs of depression in the child. This differs from the findings of the  
349 study conducted by Gautam et. al.[28] Likewise, research by Bhattarai et. al revealed depression  
350 was higher in adolescents with illiterate parents.[46] Similarly, adolescents with illiterate fathers  
351 showed low self-esteem among adolescents. This was in accordance with the research findings of  
352 Alami et. al.[41] The possible explanation might be that illiterate fathers mightn't have the

353 knowledge to boost of confidence of their children. However, educated fathers play an important  
354 role in robust their child decision-making skills and boosting their morale.

355 Relationships with friends and teachers showed an association with DAS and self-esteem. It was  
356 found that the odds of depression, anxiety, stress, and low self-esteem among adolescents having  
357 no close relationship with friends was 1.52 times, 1.99 times, 1.71 times, and 2.68 times more  
358 likely than adolescents with close relationships with friends respectively. This was in accordance  
359 with the findings of the study conducted by Gautam et. al which showed those students who have  
360 poor relationships with friends were 2.4 times more likely to be at risk of depression than those  
361 students who have a good relationship with their friends.[28] Likewise, it was found that poor  
362 relationships with teachers resulted in adolescents experiencing 1.4 times more depressive  
363 symptoms.[28] Similar studies conducted among Chinese students showed having average  
364 relationships with classmates (AOR=2.82) or poor relationships with classmates (AOR=1.60) was  
365 a risk factor for having depressive symptoms.[47] Having not close relationship might have  
366 resulted in a lack of social support which eventually resulted in early signs of DAS and low self-  
367 esteem. A similar study on high school students showed a significant association between  
368 perceived social support and level of depression.[46] Likewise, anxiety symptoms were 1.73 times  
369 more likely in adolescents with poor relationships with classmates or friends[48], which was  
370 consistent with the findings of the current study. A possible explanation might be the fact that a  
371 lack of social support results in a lack of confidence to tackle issues and worry about small  
372 problems.

373 Bullying was also found to be significant among adolescents and was associated with increased  
374 levels of DAS and a decrease in self-esteem among adolescents. Likewise, the odds of depression,  
375 anxiety, stress, and low self-esteem among adolescents who reported bullying were 2.42 times,

376 2.17 times, 1.95 times, and 2.37 times more likely than in adolescents who didn't report bullying  
377 respectively. It is consistent with the research findings of Karki et. al which showed the symptoms  
378 of depression were 2.84 times more likely among the students who were bullied electronically,  
379 symptoms of anxiety and stress were 1.36 and 1.48 times more likely in adolescents who were  
380 bullied in school property respectively.[18] Likewise, a similar study in Chinese high school  
381 students revealed that bullying victimization results in an increased level of social anxiety with the  
382 mediating role of self-esteem.[49] Similarly, another study showed consistent findings which  
383 confirmed that bullying victims have higher depressive symptoms, lower self-esteem, and higher  
384 suicide tendencies than non-victims.[50] Existing research on students also confirmed the  
385 significant association between stress and bullying.[51] The students who were bullied repeatedly  
386 experience abuse and threats which exacerbates the feeling of fear and loneliness. This causes  
387 emotional distress in adolescents, which leads to increased DAS symptoms and low self-esteem.  
388 The findings of the study should be interpreted in light of its limitations. This study took the  
389 perspective of adolescents on the perceived parenting style. This perception might differ among  
390 the parents. Future studies should try to include the perspectives of both parents and children.  
391 Likewise, maternal and parental parenting style was found to be different and can interfere with  
392 the findings so future studies should consider taking the perception of parenting style from each  
393 parent.

394

## 395 **Conclusion**

396 This study planned to assess depression, anxiety, stress, and self-esteem in adolescents and its  
397 relationship with parenting style in Bheemdatt Municipality, Kanchanpur. About one-third of

398 adolescents showed symptoms of depression, almost half of the adolescents showed symptoms of  
399 anxiety, and about one-fourth of adolescents showed symptoms of stress in Bheemdatt  
400 Municipality. Likewise, the majority of the adolescents showed high self-esteem and about one-  
401 third of adolescents showed low self-esteem. Importantly, authoritative parenting style positively  
402 predicted the DAS and negatively predicted self-esteem while authoritarian and permissive  
403 parenting style negatively predicted the DAS and positively predicted the self-esteem. This shows  
404 the important role of parenting behavior in the prediction of the mental health status of adolescents  
405 with positive parenting behavior showing a positive impact on the behavior of the child. Study  
406 covariates such as sex, grade, parent's age, and parent's education showed strong effects on the  
407 outcome of the research. Likewise, the social support system of the adolescents was found to be a  
408 strong predictor of DAS and self-esteem. Thus, improving adolescents' perceived level of social  
409 support may alleviate the mental health problems of adolescents. Similarly, students who were  
410 bullied showed a higher prevalence of DAS and low self-esteem. Therefore, prevention and control  
411 activities such as school-based counseling focusing on bullying will help to reduce mental health  
412 distress among adolescents. Hence, it is concluded that parents play an influential role in  
413 promoting the mental health of their adolescent children with the supporting role of study  
414 covariates and social support systems.

415

416

417

418

419

## 420 **Supporting information**

421 **S1 Table. Study variables and tables.** This is the study variables used in the study and tables  
422 from further analysis done in the study.

423 **S1 Tool. Study tool.** English Questionnaire

424 **S1 Data. Study dataset.** Final version of study dataset

425 **S1 Checklist. STROBE Statement.** This is the Strengthening the Reporting of Observational  
426 Studies in Epidemiology (STROBE) Statement guidelines for reporting observational studies

427

## 428 **Acknowledgment**

429 Foremost, we express our sincere gratitude towards the students for their cooperation and support  
430 during the study. Special thanks to Bheemdatt municipality for granting permission to conduct the  
431 study. Grateful to the school administration and teachers for their assistance during data collection.

432 Above all sincere gratitude towards and Department of Public Health, Manmohan Memorial  
433 Institute of Health Sciences for their unwavering leadership and assistance.

434

## 435 **Author contributions**

436 **Conceptualization:** Anjali Bhatt, Rabina Khadka

437 **Data curation:** Anjali Bhatt

438 **Formal analysis:** Anjali Bhatt, Milan Thapa



439 **Investigation:** Anjali Bhatt

440 **Methodology:** Anjali Bhatt, Rabina Khadka

441 **Project administration:** Anjali Bhatt

442 **Supervision:** Rabina Khadka, Durga Khadka Mishra

443 **Visualization:** Anjali Bhatt

444 **Writing– original draft:** Anjali Bhatt, Rabina Khadka

445 **Writing– review & editing:** Anjali Bhatt, Rabina Khadka, Milan Thapa, Anusha Sharma,

446 Manoj Joshi, Durga Khadka Mishra

447

448

449

450

451

452

453

454

455

456

457

458

459

## 460 **References**

- 461 1. World Health Organization. Adolescent health. Available: [https://www.who.int/health-](https://www.who.int/health-topics/adolescent-health#tab=tab_1)  
462 [topics/adolescent-health#tab=tab\\_1](https://www.who.int/health-topics/adolescent-health#tab=tab_1)
- 463 2. WHO. Adolescent mental health. In: 2022.
- 464 3. Institute of health Metrics and Evaluation. Global Health Data Exchange (GHDx).  
465 Adolescents Mental Health. 2019.
- 466 4. Nepal Health Research Council (NHRC). National Mental Health Survey, Nepal-2020.  
467 2020.
- 468 5. Nepal Health Research Council (NHRC), Ministry of Health and Population (MoHP),  
469 Institute of Health Metrics and evaluation ME and OR (MEOR). Nepal Burden of Disease.  
470 2019.
- 471 6. World Health Organization RO for S-EA. Mental health status of adolescents in South-East  
472 Asia: Evidence for action. New Delhi; 2017. doi:Licence: CC BY-NC-SA 3.0 IGO
- 473 7. Rohner RP, Britner PA. Worldwide Mental Health Correlates of Parental Acceptance-  
474 Rejection: Review of Cross-Cultural and Intracultural Evidence. *Cross-Cultural Res.*  
475 2002;36: 16–47. doi:10.1177/106939710203600102
- 476 8. Rohner RP, Khaleque A, Cournoyer DE. Parental Acceptance-Rejection: Theory, Methods,  
477 Cross-Cultural Evidence, and Implications. 2005;33: 299–334.  
478 doi:<https://doi.org/10.1525/eth.2005.33.3.299>
- 479 9. Xiuqin H, Huimin Z, Mengchen L, Jinan W, Ying Z, Ran T. Mental health, personality, and  
480 parental rearing styles of adolescents with Internet addiction disorder. *Cyberpsychol Behav*

- 481 Soc Netw. 2010;13: 401–406. doi:10.1089/cyber.2009.0222
- 482 10. Baumrind D. Current patterns of parental authority. Dev Psychol. 1971;4: 1–103.  
483 doi:10.1037/h0030372
- 484 11. Milevsky A, Schlechter M, Netter S. Maternal and Paternal Parenting Styles in  
485 Adolescents : Associations with Self-Esteem , Depression and Life-Satisfaction. 2007; 39–  
486 47. doi:10.1007/s10826-006-9066-5
- 487 12. Banstola RS, Ogino T, Inoue S. Impact of parents’ knowledge about the development of  
488 self-esteem in adolescents and their parenting practice on the self-esteem and suicidal  
489 behavior of urban high school students in Nepal. Int J Environ Res Public Health. 2020;17:  
490 1–19. doi:10.3390/ijerph17176039
- 491 13. Hossain SM, Huq S, Adhikari B, Zabin S, Zai E, Mohammad S, et al. Parenting skills affect  
492 child behaviors in a selected area of Nepal. banglajol.info. 2015;5: 44–48.  
493 doi:10.3329/seajph.v5i1.24851
- 494 14. Sanjeevan D, Zoysa P De. The association of parenting style on depression , anxiety and  
495 stress among Tamil speaking adolescents in the Colombo city. 2019;47: 342–347.  
496 doi:http://dx.doi.org/10.4038/sljch.v47i4.8597
- 497 15. Prativa S, Deeba F. Relationship between parenting styles and depression in adolescents. J  
498 Biol Sci. 2019;28: 49–59. doi:10.3329/dujbs.v28i1.46492
- 499 16. Zakeri H, Karimpour M. Parenting Styles and Self-esteem. Procedia - Soc Behav Sci.  
500 2011;29: 758–761. doi:10.1016/j.sbspro.2011.11.302
- 501 17. Bheemdatt Municipality. Brief Introduction Bheemdatt Municipality. 2024.

- 502 18. Karki A, Thapa B, Pradhan PMS, Basel P. Depression, anxiety and stress among high school  
503 students: A cross-sectional study in an urban municipality of Kathmandu, Nepal. PLOS  
504 Glob Public Heal. 2022;2: e0000516.
- 505 19. Robinson CC, Mandleco B, Olsen SF, Hart CH. The Parenting Styles and Dimensions  
506 Questionnaire (PSDQ). 3rd ed. In B F Perlmutter, J Touliatos, & G W Holden (Eds),  
507 Handbook of family measurement techniques. 3rd ed. Thousand Oaks: Sage; 2001. pp. 319–  
508 321.
- 509 20. Lovibond SH, Lovibond PF. Manual for the Depression Anxiety Stress Scales. 2nd ed.  
510 Sydney: Psychology Foundation; 1995.
- 511 21. ROSENBERG M. Society and the Adolescent Self-Image. Princeton University Press;  
512 1965.
- 513 22. Eun JD, Paksarian D, He J-P, Merikangas KR. Parenting style and mental disorders in a  
514 nationally representative sample of US adolescents. Soc Psychiatry Psychiatr Epidemiol.  
515 2018;53: 11–20. doi:10.1007/s00127-017-1435-4
- 516 23. Mishra P, Kiran U V. Parenting style and social anxiety among adolescents. Int J Appl home  
517 Sci 2394-1413. 2017;5: 117–123.
- 518 24. Uji, M., Sakamoto, A., Adachi K et al. The Impact of Authoritative, Authoritarian, and  
519 Permissive Parenting Styles on Children’s Later Mental Health in Japan: Focusing on Parent  
520 and Child Gender. J Child Fam Stud. 2014; 293–302. doi:[https://doi.org/10.1007/s10826-](https://doi.org/10.1007/s10826-013-9740-3)  
521 [013-9740-3](https://doi.org/10.1007/s10826-013-9740-3)
- 522 25. Jannah K, Hastuti D, Riany YE. Parenting style and depression among students: The

- 523 mediating role of self-esteem. *Psikohumaniora*. 2022;7: 39–50.  
524 doi:10.21580/pjpp.v7i1.9885
- 525 26. Yaffe Y. A narrative review of the relationship between parenting and anxiety disorders in  
526 children and adolescents. *Int J Adolesc Youth*. 2021;26: 449–459.  
527 doi:10.1080/02673843.2021.1980067
- 528 27. Singh V, Taruna ✉, Behmani RK. Parenting Styles and Mental Health of Adolescents. *J*  
529 *Psychol Behav Stud*. 2021; 41–46. doi:<https://doi.org/10.32996/jpbs.2021.1.1.6>
- 530 28. Gautam P, Dahal M, Ghimire H, Chapagain S, Baral K, Acharya R, et al. Depression among  
531 Adolescents of Rural Nepal: A Community-Based Study. Rybakowski JK, editor. *Depress*  
532 *Res Treat*. 2021;2021: 1–9. doi:10.1155/2021/7495141
- 533 29. Choulagai BP, Sharma P. Stress, anxiety, and depression among adolescent students of  
534 public schools in Kathmandu. *J Inst Med Nepal*. 2020;40: 29–37.
- 535 30. Bhandari K, Adhikari C. Prevalence and Factors Associated with Anxiety Disorder among  
536 Secondary School Adolescents of Dang District, Nepal. *J Gandaki Med Coll*. 2015; 53–56.
- 537 31. Bhasin SK, Sharma R, Saini NK. Depression, anxiety and stress among adolescent students  
538 belonging to affluent families: A school-based study. *Indian J Pediatr*. 2010;77: 161–165.  
539 doi:10.1007/s12098-009-0260-5
- 540 32. Anjum A, Hossain S, Sikder T, Uddin ME, Rahim DA. Investigating the prevalence of and  
541 factors associated with depressive symptoms among urban and semi-urban school  
542 adolescents in Bangladesh: a pilot study. *Int Health*. 2022;14: 354–362.  
543 doi:10.1093/inthealth/ihz092

- 544 33. Jha KK, Singh SK, Nirala SK, Kumar C, Kumar P, Aggrawal N. Prevalence of Depression  
545 among School-going Adolescents in an Urban Area of Bihar, India. *Indian J Psychol Med.*  
546 2017;39: 287–292. doi:10.4103/0253-7176.207326
- 547 34. Sandal RK, Goel NK, Sharma MK, Bakshi RK, Singh N, Kumar D. Prevalence of  
548 Depression, Anxiety and Stress among school going adolescent in Chandigarh. *J Fam Med*  
549 *Prim Care.* 2017;6.
- 550 35. Zhang S, Yang R, Li D, Wan Y, Tao F, Fang J. Association of health literacy and sleep  
551 problems with mental health of Chinese students in combined junior and senior high school.  
552 *PLoS One.* 2019;14: e0217685.
- 553 36. Billah SMB, Khan FI. Depression among Urban Adolescent Students of Some Selected  
554 Schools. *Faridpur Med Coll J.* 2015;9: 73–75. doi:10.3329/fmcj.v9i2.25678
- 555 37. Rodrigo C, Welgama S, Gurusinghe J, Wijeratne T, Jayananda G, Rajapakse S. Symptoms  
556 of anxiety and depression in adolescent students; a perspective from Sri Lanka. *Child*  
557 *Adolesc Psychiatry Ment Health.* 2010;4: 10. doi:10.1186/1753-2000-4-10
- 558 38. Nguyen DT, Dedding C, Pham TT, Wright P, Bunders J. Depression, anxiety, and suicidal  
559 ideation among Vietnamese secondary school students and proposed solutions: a cross-  
560 sectional study. *BMC Public Health.* 2013;13: 1195. doi:10.1186/1471-2458-13-1195
- 561 39. Kumar KS, Akoijam BS. Depression, Anxiety and Stress Among Higher Secondary School  
562 Students of Imphal, Manipur. *Indian J community Med Off Publ Indian Assoc Prev Soc*  
563 *Med.* 2017;42: 94–96. doi:10.4103/ijcm.IJCM\_266\_15
- 564 40. Aremu TA, John-Akinola YO, Desmennu AT. Relationship Between Parenting Styles and

- 565 Adolescents' Self-Esteem. *Int Q Community Health Educ.* 2018;39: 91–99.  
566 doi:10.1177/0272684X18811023
- 567 41. Alami A, Khosravan S, Sadegh Moghadam L, Pakravan F, Hosseni F. Adolescents' self-  
568 esteem in single and two-parent families. *Int J community based Nurs midwifery.* 2014;2:  
569 69–76.
- 570 42. Abbo C, Kinyanda E, Kizza RB, Levin J, Ndyabangi S, Stein DJ. Prevalence, comorbidity  
571 and predictors of anxiety disorders in children and adolescents in rural north-eastern  
572 Uganda. *Child Adolesc Psychiatry Ment Health.* 2013;7: 21. doi:10.1186/1753-2000-7-21
- 573 43. Alharbi R, Alsuhaibani K, Almarshad A, Alyahya A. Depression and anxiety among high  
574 school student at Qassim Region. *J Fam Med Prim Care.* 2019;8.
- 575 44. Mohammadi MR, Pourdehghan P, Mostafavi S-A, Hooshyari Z, Ahmadi N, Khaleghi A.  
576 Generalized anxiety disorder: Prevalence, predictors, and comorbidity in children and  
577 adolescents. *J Anxiety Disord.* 2020;73: 102234.  
578 doi:<https://doi.org/10.1016/j.janxdis.2020.102234>
- 579 45. Simegn W, Dagne B, Yeshaw Y, Yitayih S, Woldegerima B, Dagne H. Depression,  
580 anxiety, stress and their associated factors among Ethiopian University students during an  
581 early stage of COVID-19 pandemic: An online-based cross-sectional survey. *PLoS One.*  
582 2021;16: e0251670.
- 583 46. Bhattarai D, Shrestha N, Paudel S. Prevalence and factors associated with depression among  
584 higher secondary school adolescents of Pokhara Metropolitan, Nepal: A cross-sectional  
585 study. *BMJ Open.* 2020;10: 1–9. doi:10.1136/bmjopen-2020-044042

- 586 47. Guo L, Deng J, He Y, Deng X, Huang J, Huang G, et al. Prevalence and correlates of sleep  
587 disturbance and depressive symptoms among Chinese adolescents: a cross-sectional survey  
588 study. *BMJ Open*. 2014;4: e005517. doi:10.1136/bmjopen-2014-005517
- 589 48. Shao R, He P, Ling B, Tan L, Xu L, Hou Y, et al. Prevalence of depression and anxiety and  
590 correlations between depression, anxiety, family functioning, social support and coping  
591 styles among Chinese medical students. *BMC Psychol*. 2020;8: 38. doi:10.1186/s40359-  
592 020-00402-8
- 593 49. Wu X, Qi J, Zhen R. Bullying Victimization and Adolescents' Social Anxiety: Roles of  
594 Shame and Self-Esteem. *Child Indic Res*. 2021;14: 769–781. doi:10.1007/s12187-020-  
595 09777-x
- 596 50. Dergisi AP, Hesap ST. Bullying in schools and its relation with depressive symptoms , self-  
597 esteem , and suicidal ideation in adolescents. 2018. doi:10.5455/apd.268900
- 598 51. Konishi C, Hymel S. Bullying and Stress in Early Adolescence: The Role of Coping and  
599 Social Support. *J Early Adolesc*. 2008;29: 333–356. doi:10.1177/0272431608320126
- 600
- 601
